# Supplementary material
Source: PubMed Central journal article supplement (PMC6482088)
Supplement: NIHMS1518569-supplement-1.pdf [file NIHMS1518569-supplement-1.pdf]

# **Atomic structure of the translation regulatory protein NS1 of bluetongue virus**

Adeline Kerviel<sup>1,5</sup>, Peng Ge<sup>2,5</sup>, Mason Lai<sup>2,3,5</sup>, Jonathan Jih<sup>2</sup>, Mark Boyce<sup>1</sup>, Xing Zhang<sup>2,4</sup>, Z.  
Hong Zhou<sup>2,3,\*</sup>, Polly Roy<sup>1,\*</sup>

<sup>1</sup>Department of Pathogen Molecular Biology, London School of Hygiene and Tropical  
Medicine, United Kingdom

<sup>2</sup>California NanoSystems Institute, University of California, Los Angeles (UCLA), Los  
Angeles CA 90095, USA

<sup>3</sup>Department of Microbiology, Immunology & Molecular Genetics, UCLA, CA 90095, USA

<sup>4</sup>Current Address: Center of Cryo Electron Microscopy, Department of Biophysics, Zhejiang  
University School of Medicine, Hangzhou, China

<sup>5</sup>These authors contributed equally: Adeline Kerviel, Peng Ge, Mason Lai.

## **Supplementary Information**

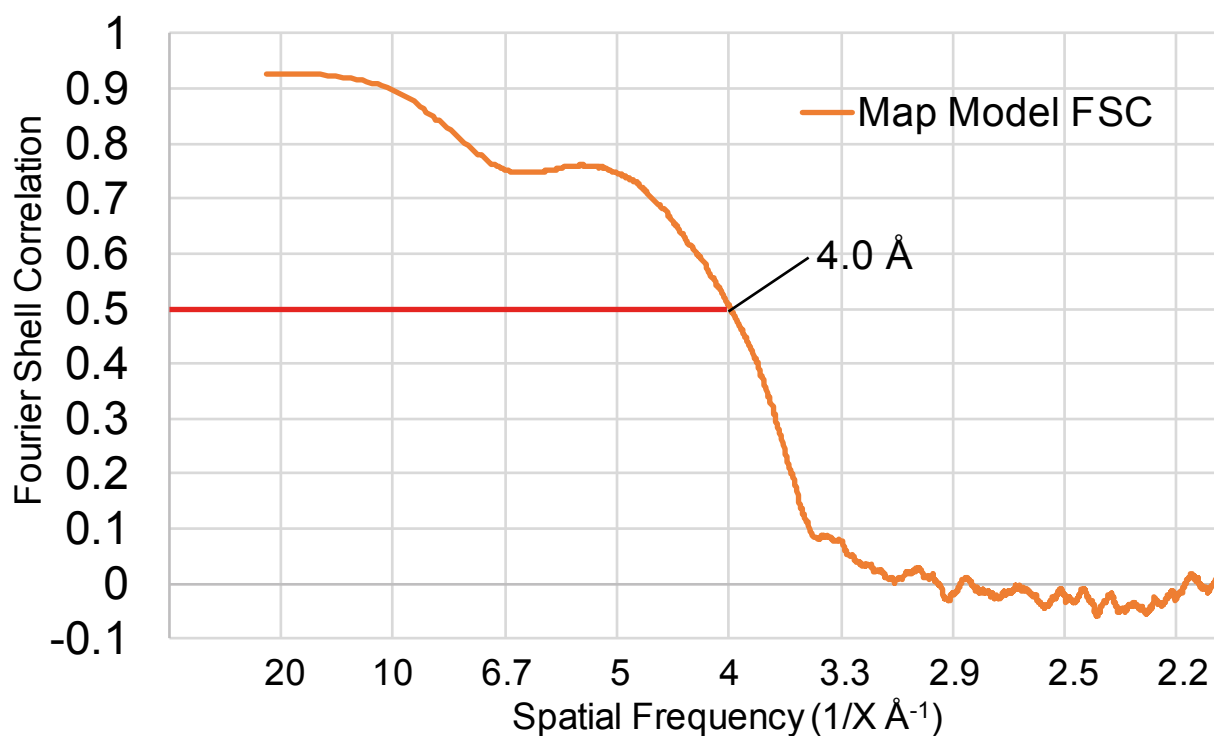

**Supplementary Figure 1: Fourier shell correlation (FSC) between the cryoEM density map and our atomic model showing a resolution of 4.0 Å.**

**a**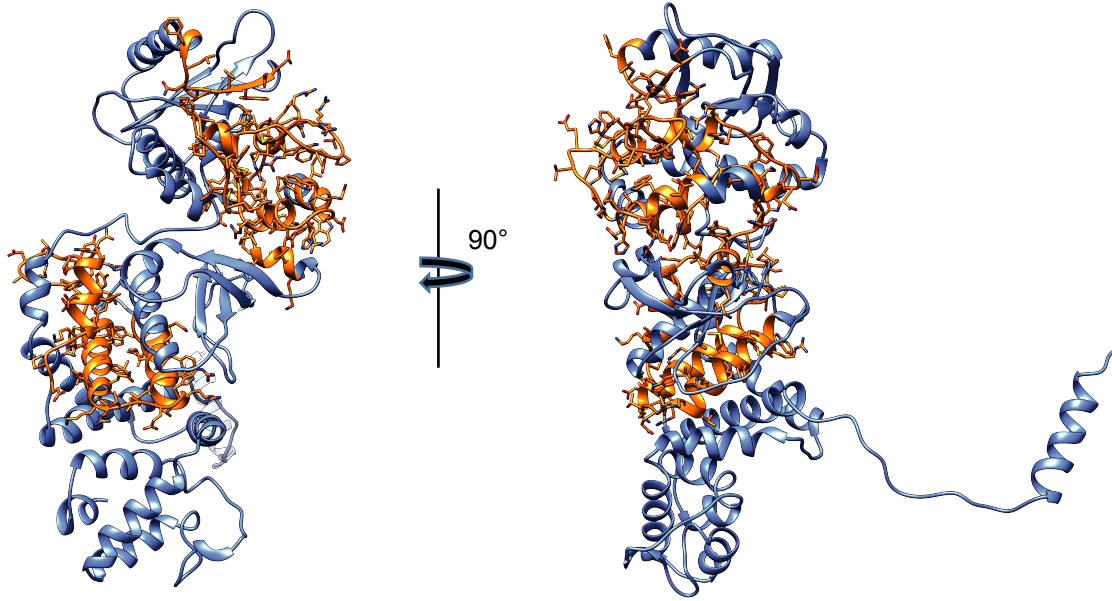**b**

|         |                                                               |     |
|---------|---------------------------------------------------------------|-----|
| NS1_BT1 | -----MERFL                                                    | 5   |
| RoXaN   | MERQKRKADIEKGLQFIQSTLPLKQEEYEAFLKLVQNLFAEGNDLFRKDYKQALVQYM    | 60  |
| NS1_BT1 | RKYNISGDYANATRTFLAISPNITCS-HL-KRNCLFNGMCAKQNERAM-IAATDAEPPA   | 62  |
| RoXaN   | EGLNV-ADYAASDQ--VALPRELLCKLHMRAACYFTMGLYEKALDESEKALGDSEISIR   | 117 |
| NS1_BT1 | KAYRLVELAKEAMYDRETMILQCFSK--FSQPYEEDVEGK---MKRCGAQLLEDYRK--   | 114 |
| RoXaN   | ALFRKARALNE--LGRHKEAYECCSRCSLALPHDESVTQLGQELAQLGLRVRKAYKRPO   | 175 |
| NS1_BT1 | -----NGMDEAVKQ-----SALVNSERVLDDSLSAMPYIYVPIKEG                | 152 |
| RoXaN   | ELETFSLLSNGTAAGVADQGTSNGLGSIIDDIETGNVPOTREQV--EIGAPRDCYVDRPGS | 233 |
| NS1_BT1 | QIV-----NPTFISRYRQI-----AYFYSPNLADDNIIDPNLFGIRGQHN-----       | 192 |
| RoXaN   | PALLSTPTMPLPFHVLDDLAPLDDSRTPSTDSLDDFSDGDFVGPEDLTLDDSLSLVQG    | 293 |
| NS1_BT1 | ----QIKREVERQVNTCPYT----GYKGRVLQVMFLPIQLINFLRMDDFAKHFNRYA-    | 241 |
| RoXaN   | GLSGSGVPSLELPQIIPVFPGGTPLLPPVWGGSIIPV--SSPLPPASGFLWDPKLAASVL  | 352 |
| NS1_BT1 | -----SMAIQQLRVGYAEVRYVQQLFGKIPTGEFPLHMMWLRDFPTRDRSIVEAR       | 295 |
| RoXaN   | DALDPPGPTLDPLDLPYSETLDALOSFGSTR-G-----SLDKPD-SFMEET           | 398 |
| NS1_BT1 | ----VRRSGDENMQS----HLLPMIIVREGLDHQERWEWLDYMDRKHTCQLCYLKHIS    | 345 |
| RoXaN   | NSQDHRPPSGAQKPAPEPCMPNTALLIKNP-----LAATHEFKACQLCYPKTG         | 449 |
| NS1_BT1 | KQIPTGVIDVRASELTGCSPFKTVKIEEHVGNISVFETKLRVDEQIGRIGDHYHT----   | 401 |
| RoXaN   | PRA---GDYTYREGLHKKRDLGLGR-LRSEDQTMKRIRPRPTKTSFVGSYYLCKDHI     | 505 |
| NS1_BT1 | --THICYGAEALITTAIHIHRWIRGCGIWDDEGMQE---GI-F-HLG---RVLLRWELTK  | 451 |
| RoXaN   | NKQDCKYGDNCTF-----AYHQEIDVWTEERKGTLNROLLFDPLGGVGRGSLTIAKLL    | 559 |
| NS1_BT1 | AQRALLRLFCFVCYGYAPRADGTIPDW----NWL---GSFLD----TILKGPSESD      | 498 |
| RoXaN   | KEHQGIFTFLCEICFDSKPRIISKGTKDSVSCSNLAAKHSFYWKCLVHIVRSTSLK-Y    | 618 |
| NS1_BT1 | EDERAYATHFEMVRCIITLCYAEKVHFAAGFAAPACESGE--VINLA-----          | 542 |
| RoXaN   | SKIRQFQEHFQFDVCRHEV-----RYGCLREDSCHFAHSFIELKWLMLQQYSGMTHEDI   | 672 |
| NS1_BT1 | -ARMSQMMHEY-----                                              | 552 |
| RoXaN   | VQESKKYVQQMEAHAGKASSSMGAPRTHGPSTFDLQMKFVCGQCHRNQVVEPKDLKYC    | 732 |

**Supplementary Figure 2: Possible conservation between BTV NS1 and rotavirus X protein associated with NSP3 (RoXaN).** (a) Two orthogonal views of the NS1 atomic model. Areas exhibiting sequence similarity to RoXaN are highlighted in orange with sidechains shown. Note the concentration of disjointed regions with sequence similarity along surfaces of the head and body domains. (b) Multiple sequence alignment of NS1 and RoXaN using Clustal Omega (<https://www.ebi.ac.uk/Tools/msa/clustalo/>). The whole sequence of BTV1 NS1 and the first 732 residues of RoXaN are shown (respective accession numbers: AGW27484 and Q9UGR2). Motif 2 of NS1 and its similarity with RoXaN is highlighted in yellow.

**a**

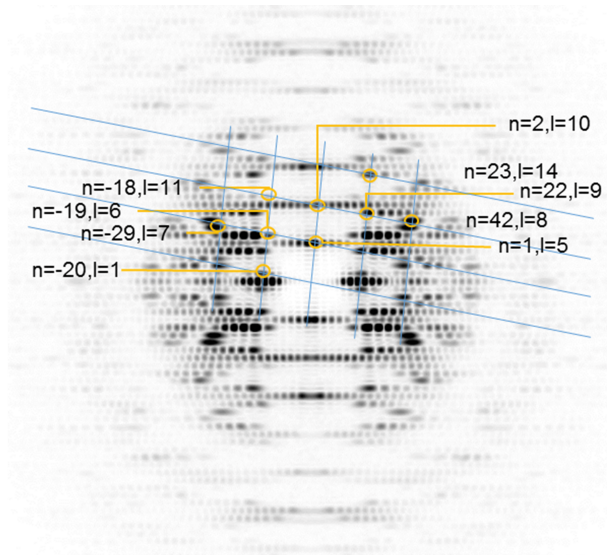

**b**

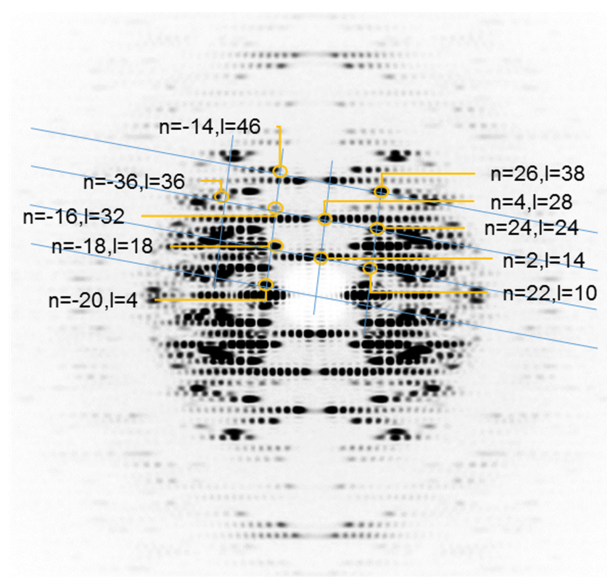

**c**

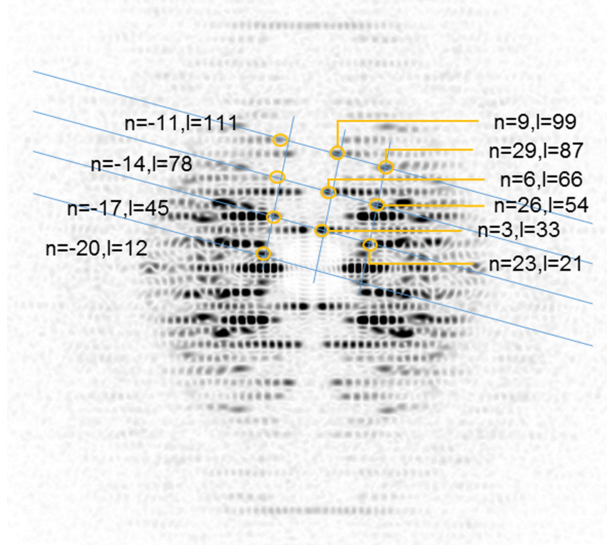

**Supplementary Figure 3: Selection rule for all three helical forms of class 2 diameter helices (tier II) (a, b, c).**



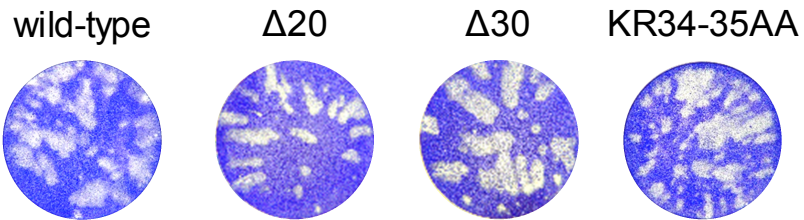

**Supplementary Figure 4: Recovery of  $\Delta 20$ ,  $\Delta 30$  and KR34-35AA mutant viruses by reverse genetics as compared to the wild-type virus.** Experiment was repeated twice independently with similar results.

| Bluetongue Virus Non-structural protein 1<br>(EMDB-0383)<br>(PDB 6N9Y) |                |
|------------------------------------------------------------------------|----------------|
| <b>Data collection and processing</b>                                  |                |
| Magnification                                                          | 130,000x       |
| Voltage (kV)                                                           | 300            |
| Electron exposure (e <sup>-</sup> /Å <sup>2</sup> )                    | 30             |
| Defocus range (μm)                                                     | 1.2-4          |
| Pixel size (Å)                                                         | 1.104          |
| Symmetry imposed                                                       | helical        |
| Initial particle images (no.)                                          | 87,190         |
| Final particle images (no.)                                            | 7,793          |
| Map resolution (Å)                                                     | 4.0            |
| FSC threshold                                                          | 0.5            |
| Map resolution range (Å)                                               | 200-3.7        |
| <b>Refinement</b>                                                      |                |
| Initial model used (PDB code)                                          | <i>De novo</i> |
| Model resolution (Å)                                                   | 4.0            |
| FSC threshold                                                          | 0.5            |
| Model resolution range (Å)                                             | 80-4.0         |
| Map sharpening <i>B</i> factor (Å <sup>2</sup> )                       | 160            |
| Model composition                                                      |                |
| Non-hydrogen atoms                                                     | 4527           |
| Protein residues                                                       | 552            |
| Ligands                                                                | 0              |
| <i>B</i> factors (Å <sup>2</sup> )                                     |                |
| Protein                                                                | 30             |
| Ligand                                                                 |                |
| R.m.s. deviations                                                      |                |
| Bond lengths (Å)                                                       | 0.008          |
| Bond angles (°)                                                        | 0.979          |
| Validation                                                             |                |
| MolProbity score                                                       | 1.77           |
| Clashscore                                                             | 4.80           |
| Poor rotamers (%)                                                      | 0.42           |
| Ramachandran plot                                                      |                |
| Favored (%)                                                            | 90.91          |
| Allowed (%)                                                            | 9.09           |
| Disallowed (%)                                                         | 0              |

**Supplementary Data Table 1: Cryo-EM data collection, refinement and validation statistics.**
